# Supplementary material for: Associations between traffic-related air pollution and allergic rhinitis outpatient visits in three cities of Gansu Province
Source: Royal Society of Chemistry journal article supplement (doi:10.1039/d4em00234b), 2024-01-01
Supplement: d4em00234b1.pdf [file d4em00234b1.pdf]

**Table S1** Associations of each 10 µg/m<sup>3</sup> increase in pollutants (each 1mg/m<sup>3</sup> increase in CO concentration)<sup>a</sup> with relative risk of outpatient visits for AR using single and two pollutant models in three cities.

| Pollutants and Models  | PM <sub>2.5</sub>   | NO <sub>2</sub>    | CO                  |
|------------------------|---------------------|--------------------|---------------------|
| <b>Dingxi</b>          |                     |                    |                     |
| Single-pollutant model | 4.696(1.899,11.614) | 1.248(1.080,1.442) | 2.006(1.107,3.637)  |
| + PM <sub>2.5</sub>    | -                   | 1.349(1.153,1.579) | 2.098(1.161,6.567)  |
| + PM <sub>10</sub>     | -                   | 1.255(1.080,1.454) | 1.926(1.043,3.556)  |
| + SO <sub>2</sub>      | 4.483(1.952,6.476)  | 1.173(1.082,1.373) | 1.984(1.043,3.991)  |
| + NO <sub>2</sub>      | 4.987 (1.652,7.519) | -                  | 2.067(1.244,2.562)  |
| + O <sub>3</sub> 8h    | 4.451(1.564,16.231) | 1.241(1.072,1.436) | 2.261(1.225,4.174)  |
| + CO                   | 5.096(1.594,14.328) | 1.236(1.096,1.343) | -                   |
| <b>Longnan</b>         |                     |                    |                     |
| Single-pollutant model | 2.462 (1.474,4.113) | 2.378(1.304,4.336) | 1.502(1.096,2.059)  |
| + PM <sub>2.5</sub>    | -                   | 2.292(1.233,3.750) | 1.732(1.044,3.449)  |
| + PM <sub>10</sub>     | -                   | 2.099(1.204,4.043) | 1.480(1.032,2.123)  |
| + SO <sub>2</sub>      | 2.263(1.741,3.908)  | 2.142(1.164,3.870) | 1.566(1.032,3.079)  |
| + NO <sub>2</sub>      | 2.408(1.741,4.623)  | -                  | 1.468(1.138,3.244)  |
| + O <sub>3</sub> 8h    | 2.504(1.743,4.435)  | 2.104(0.240,2.410) | 1.684(1.122,2.321)  |
| + CO                   | 2.595(1.457,4.492)  | 2.213(1.225,4.228) | -                   |
| <b>Tianshui</b>        |                     |                    |                     |
| Single-pollutant model | 1.062(1.033,1.092)  | 1.142(1.090,1.197) | 1.385(1.137,1.686)  |
| + PM <sub>2.5</sub>    | -                   | 1.129(1.061,1.202) | 1.127(0.890, 1.427) |
| + PM <sub>10</sub>     | -                   | 1.134(1.075,1.196) | 1.329(1.084,1.629)  |
| + SO <sub>2</sub>      | 1.010 (1.013,1.048) | 1.164(1.075,1.232) | 1.026(1.084,1.304)  |
| + NO <sub>2</sub>      | 1.058 (1.016,1.092) | -                  | 1.256(1.078,1.612)  |
| + O <sub>3</sub> 8h    | 1.054(1.024,1.084)  | 1.137(1.082,1.196) | 1.268(1.024,1.569)  |
| + CO                   | 1.046(1.011,1.082)  | 1.141(1.076,1.210) | -                   |

<sup>a</sup> Concentration of PM<sub>2.5</sub> at lag04, NO<sub>2</sub> at lag06 and CO at lag06 were analyzed.

**Table S2** Relative risk (%) and 95%CI of daily outpatient visits for AR associated with a 10  $\mu\text{g}/\text{m}^3$  increase in pollutants concentrations (each 1mg/m<sup>3</sup> increase in CO concentration)<sup>a</sup> under varying degrees of freedom for the smooth functions of calendar time in single-pollutant models.

| df for time (per year) | PM <sub>2.5</sub>   | NO <sub>2</sub>    | CO                 |
|------------------------|---------------------|--------------------|--------------------|
| Dingxi                 |                     |                    |                    |
| 6                      | 5.004(2.119,12.781) | 1.252(1.088,1.440) | 2.001(1.100,3.623) |
| 7                      | 4.696(1.899,11.614) | 1.248(1.080,1.442) | 2.006(1.107,3.637) |
| 8                      | 4.396(1.823,10.599) | 1.164(1.004,1.350) | 2.010(1.009,3.578) |
| 9                      | 4.337(1.797,10.467) | 1.156(1.010,1.352) | 2.090(1.111,3.865) |
| 10                     | 4.811(1.625,8.940)  | 1.173(1.014,1.356) | 2.011(1.105,3.754) |
| Longnan                |                     |                    |                    |
| 6                      | 2.462 (1.474,4.113) | 2.370(1.300,4.336) | 1.363(1.087,1.920) |
| 7                      | 2.384(1.574, 4.115) | 2.378(1.304,4.336) | 1.502(1.096,2.059) |
| 8                      | 2.228(1.453,4.053)  | 2.323(1.297,4.297) | 1.503(1.068,2.117) |
| 9                      | 2.435(1.574,4.216)  | 2.289(1.304,4.401) | 1.450(1.020,2.062) |
| 10                     | 2.375(1.572,4.113)  | 2.254(1.104,4.345) | 1.453(1.050,2.010) |
| Tianshui               |                     |                    |                    |
| 6                      | 1.060(1.029,1.092)  | 1.115(1.056,1.178) | 1.217(1.083,1.508) |
| 7                      | 1.062(1.033,1.092)  | 1.142(1.090,1.197) | 1.385(1.137,1.686) |
| 8                      | 1.060(1.029,1.092)  | 1.177(1.113,1.244) | 1.351(1.093,1.669) |
| 9                      | 1.037(1.006,1.070)  | 1.153(1.089,1.221) | 1.195(1.063,1.483) |
| 10                     | 1.051(1.021,1.083)  | 1.154(1.093,1.218) | 1.294(1.043,1.604) |

<sup>a</sup> Concentration of PM<sub>2.5</sub> at lag04, NO<sub>2</sub> at lag06, and CO at lag06 were analyzed.
